# Supplementary material
Source: PubMed Central journal article supplement (PMC2705046)
Supplement: pp.109.140905_1.pdf [file pp.109.140905_1.pdf]

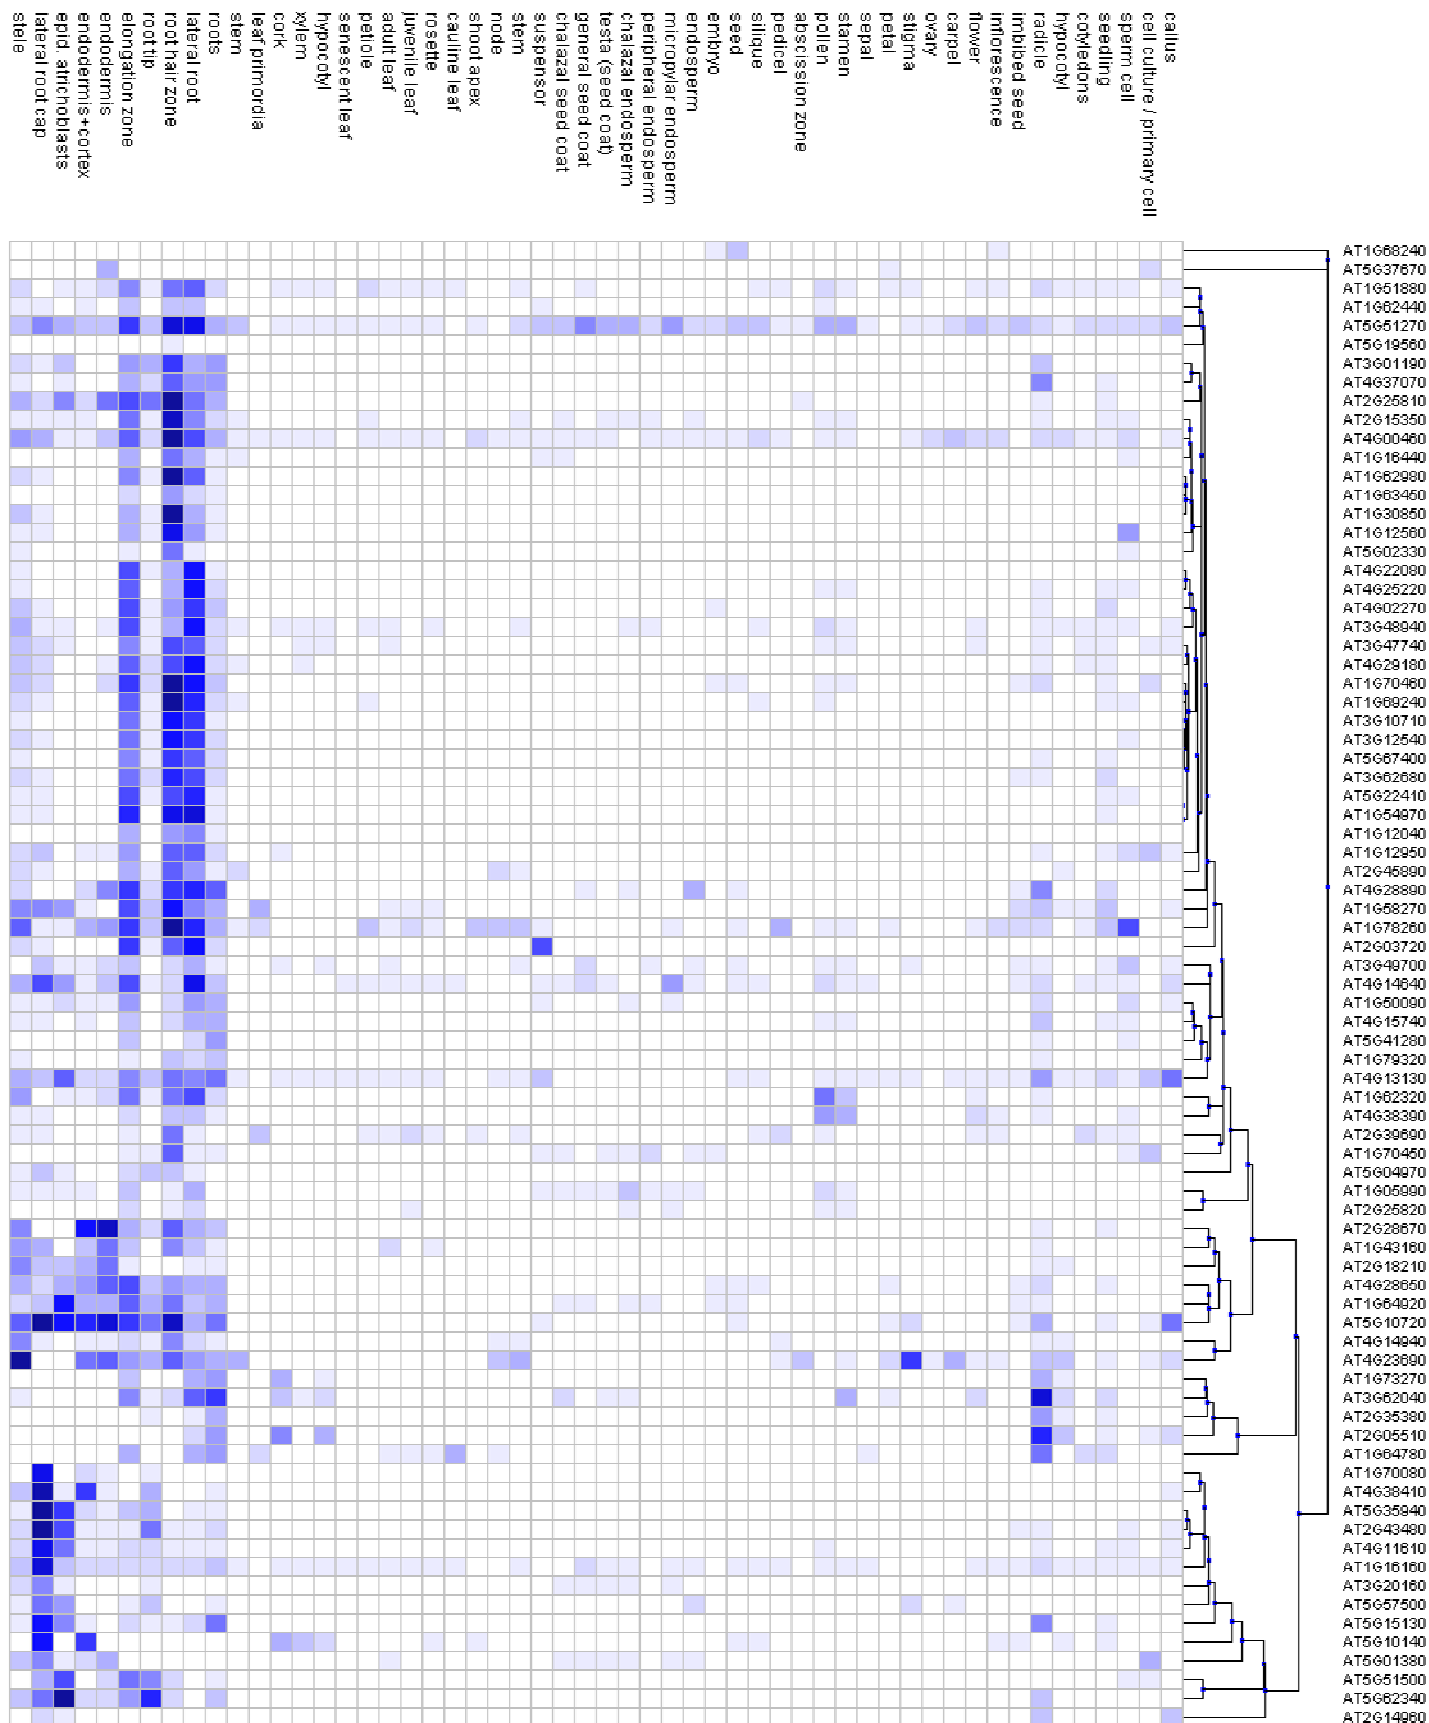

**Figure S1.** Tissue-specific expression profile of the genes that were screened through the RHE-Patmatch and root-specific microarray filters. The gene expression profile (heat map) was drawn by the Genevestigator program ([www.genevestigator.com](http://www.genevestigator.com)). Darker blue color indicates higher gene expression.

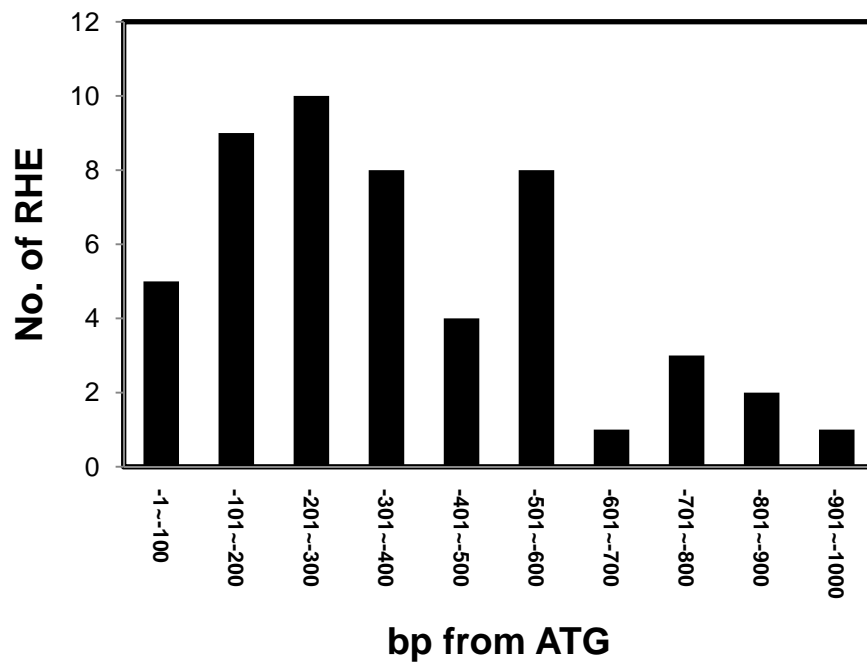

**Figure S2.** Distribution of RHE in the Promoters (upstream 1000 bp from ATG) of *Arabidopsis* Root Hair-specific Genes. A total of 51 RHEs from 29 root hair-specific genes was analyzed.

**Filters:**

- RHE-Patmatch (RHE)
- 3 Root hair mutant microarray (3RHmut)
- Root specific Genevestigator microarray (RS)

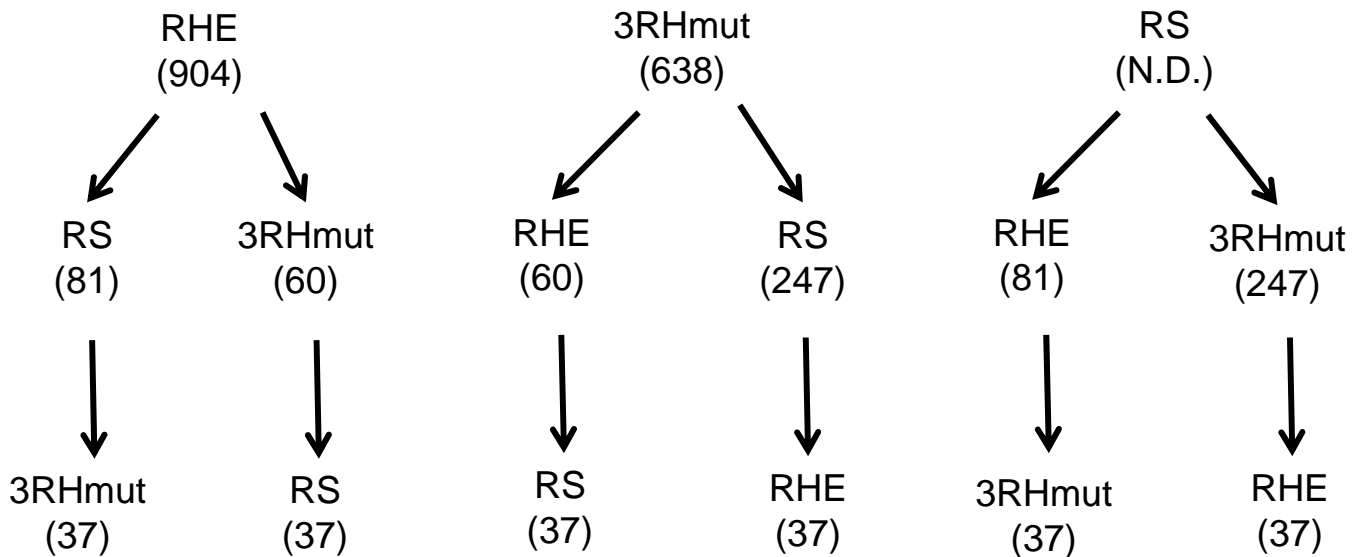

**Figure S3.** The summary of screening processes for putative root hair-specific genes using 3 different filters in different orders. Numbers in parentheses indicate the gene numbers after administration of the corresponding filtering step. The root specific gene number in the whole Arabidopsis gene set could not be determined because of technical limitation in the Genevestigator program. However, its filtration effect can be inferred when combined with other two filters.

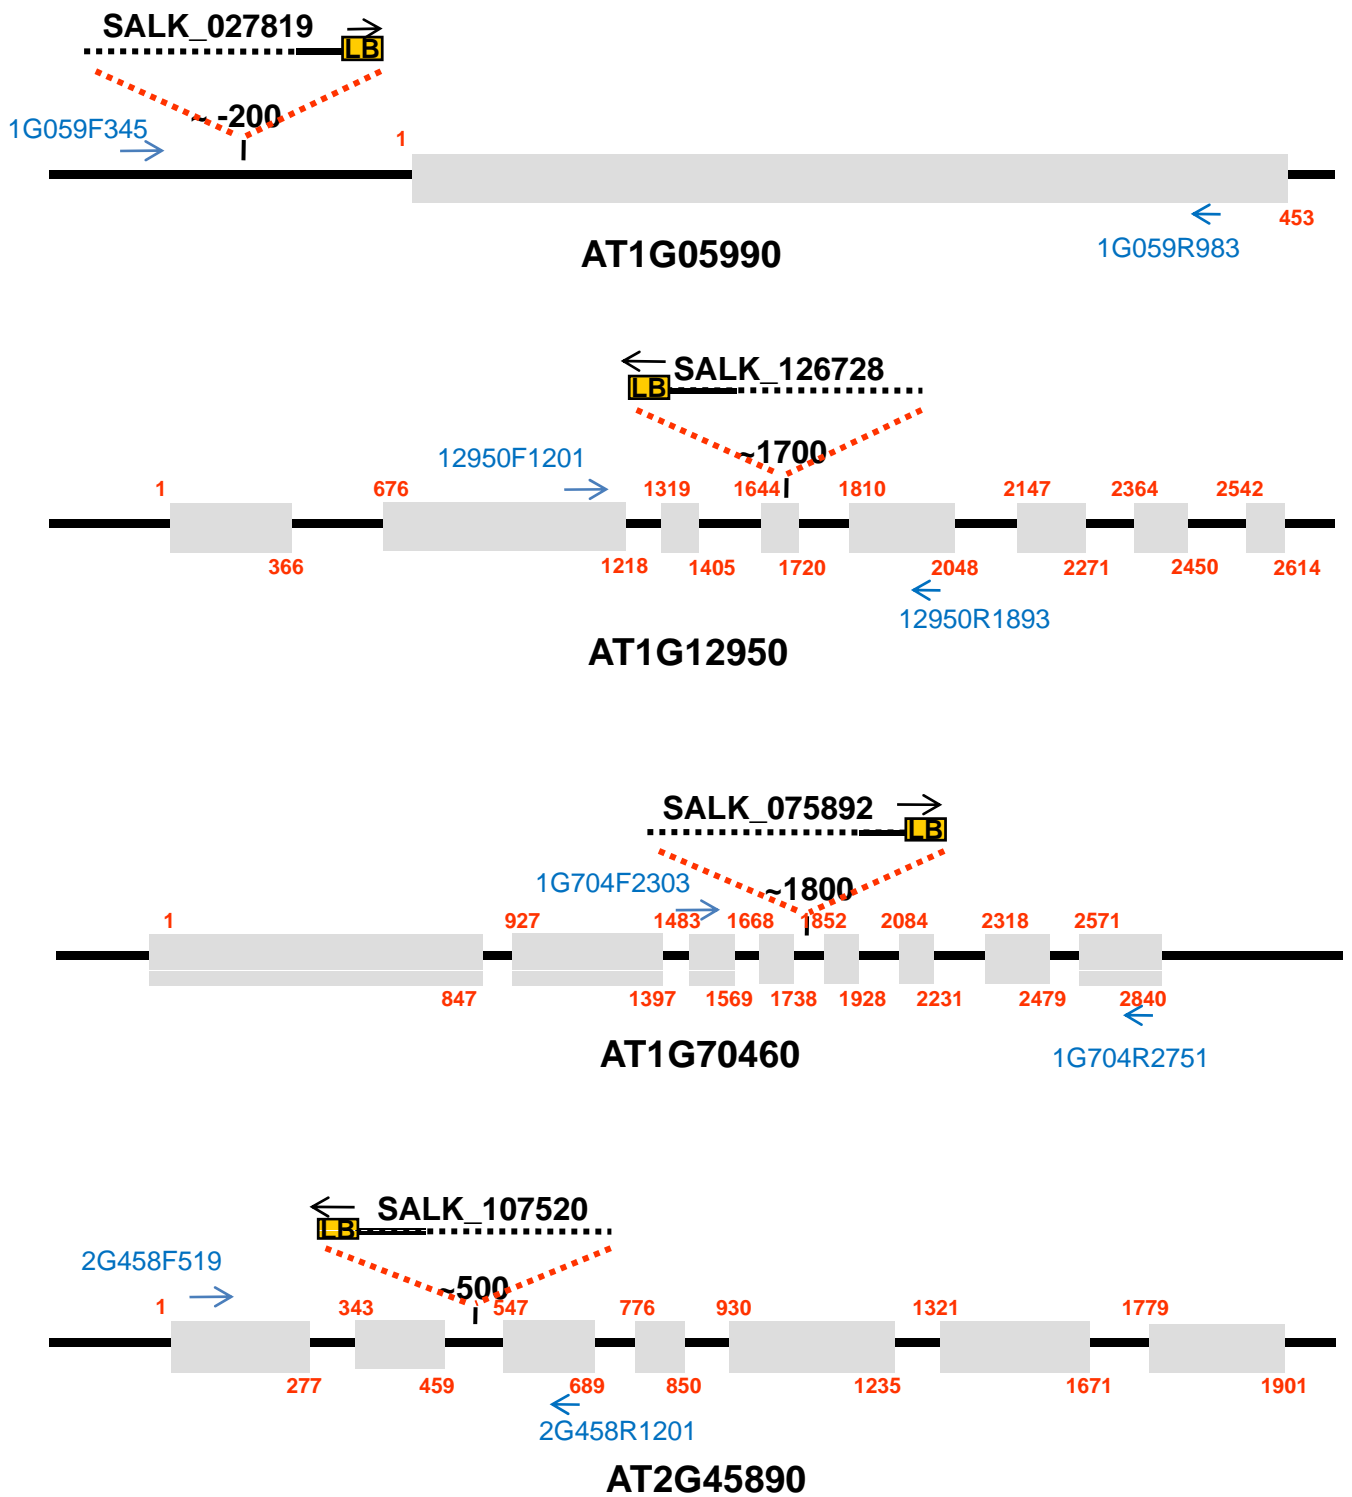

**Figure S4.** T-DNA insertion maps of 4 *RHS* genes whose loss-of-function mutations showed phenotypic effects on root hair growth. Gene-specific primers and LBb1 primer for the confirmation of T-DNA insertion are indicated for each map.

**Table S2. Primers for Constructing *Promoter:GFP* Reporters**

| Gene      | Primer name <sup>1</sup> | Primer sequence (5' to 3')              |
|-----------|--------------------------|-----------------------------------------|
| AT1G05990 | 1G05Hd81F                | TTT CAA GCT TAT GCA ATT TTA TTT TTT TCC |
|           | 1G05Xb1186R              | CTC TTC TAG AGT TGT AGT GTT GCG TG      |
| AT1G12950 | 1G12Hd492F               | CAA AAA GCT TTC GAT ATT CAT ATG CTC T   |
|           | 1G12Xb1614R              | GAC GTC TAG AGA AAG AGA AAG AGA GAA A   |
| AT1G16440 | 1G16Xb276F               | TCG ACT CTA GAC TAA ATC CAA GAA T       |
|           | 1G16Xm1158R              | GTT AAC CCG GGG ATT GCT GAT TAA CAG A   |
| AT1G18940 | 1G18Xb404F               | ATC ATC TAG ATG TTT CTA GGG TTT TAC C   |
|           | 1G18Xm841R               | TTT CCC CGG GAG AAG AAA AAG ACA GA      |
| AT1G30850 | 1G30Xb1041F              | GAT TCT AGA ACG CCA AAA AAG CAC AGA     |
|           | 1G30Xm1688R              | TTG TCC CGG GAA AAA AAA AGA TCA GAT T   |
| AT1G34760 | 1G34Hd197F               | TTA AAA GCT TCG TAA ACC CTA ATT TCA T   |
|           | 1G34Xm1118R              | GCT TCC CGG GTC TCT CTT CTC TCT         |
| AT1G51880 | 1G51Hd243F               | TAT CAA GCT TTG TTG TTT ATT ATA ATC GA  |
|           | 1G51Xb962R               | TTC TTC TAG ATT TGC AGT GAG TGC T       |
| AT1G54970 | 1G54Hd404F               | TTC GAA AGC TTC GTC TTC TCA GTG T       |
|           | 1G54Xb1571R              | GCC ATT CTA GAG CGC GTG GTT AGT GTT     |
| AT1G63450 | 1G63Xb248F               | CCT TAT CTA GAA TTT AAG TCC ATG A       |
|           | 1G63Xm1660R              | CAT TTC CCG GGT TGG TTG TTT TTT GGA T   |
| AT1G69240 | 1G69Hd174F               | ACA AAG CTT GAA AAA TGT ATT AAT CAT T   |
|           | 1G69Xb1618R              | TTT TTC TAG ATT TTT GGT TTT TCT TGT AA  |
| AT1G70450 | 1G7045Hd896F             | TAT TTA AGC TTT TCA ACT TCT AAT T       |
|           | 1G7045Xm1843R            | CAC ATC CCG GGA ATT GTT CCT GTT ATC C   |
| AT1G70460 | 1G7046Hd696F             | TTG GTA AGC TTA TTT GGA AGA AGT G       |
|           | 1G7046Xb1615R            | TTT TGT CTA GAT TGA ATT TGT TTC TGT     |
| AT2G03720 | 2G03Hd275F               | GAT CAA AGC TTG TGT CAT TTG ATT TT      |
|           | 2G03Xb964R               | CCA TCT CTA GAC TCC CAC TCT CAG CTT G   |
| AT2G45890 | 2G45Hd137F               | AGC TAA AGC TTG GCA CGA ACT ATG C       |
|           | 2G45Xb1114R              | ATC ACT CTA GAG TAT AAT GAT CAA TGT T   |
| AT3G10710 | 3G10Xb730F               | AGG GTC TAG AAG TTG TAC AAT GTA TAT C   |
|           | 3G10Xm1489R              | GTA TCC CGG GTC CCT CTT TTC TAA TTT T   |
| AT3G12540 | 3G125HdF404              | CAG AAA GCT TCG ACT TTC CGA TTG TG      |
|           | 3G125XbR1260             | ATT TTC TAG ACT TCT CTT TGA AGA CTT C   |
| AT3G47740 | 3G47Xb268F               | TCA ATC TAG AGA TCC AAT TCT TAA TGT G   |
|           | 3G47Xm1528R              | AAA GCC CGG GTA GCT TTC CCT TCT TTG T   |

|           |              |                                         |
|-----------|--------------|-----------------------------------------|
| AT3G48940 | 3G48Hd589F   | TTT CAA AGC TTA TTC ACA AAT GAC G       |
|           | 3G48Xb1653R  | TGG TTT CTA GAG TAT TAC GAT TGA TC      |
| AT4G15740 | 4G15Hd390F   | TAC ACA AGC TTA TCA ACA TCA TTG GA      |
|           | 4G15Xb1487R  | CAT CTT CTA GAG TTA CAA AAT TAT TGA     |
| AT4G02270 | 4G02Hd1607F  | GTA CTA AGC TTT TTC TTA CAA AAT T       |
|           | 4G02Xb2309R  | GCC ATT CTA GAT TTT TGC TTG CTT TGT T   |
| AT4G22080 | 4G22Hd318F   | ATG AAA GCT TAT AAA CGT CAA GAG TTT A   |
|           | 4G22Xb1628R  | TGG GTC TAG AGT TTG AGT AGG GAT C       |
| AT4G25220 | 4G25Hd598F   | CTG TAA GCT TTG ATC TCC AGT CGA ACA T   |
|           | 4G25Xm1697R  | AAG ACC CCG GGA ACC TGA AAA GCA GA      |
| AT4G29180 | 4G29Xb235F   | ATC TTC TAG ATC TTT TCA CTT CAA AAG GC  |
|           | 4G29Xm920R   | AAA GCC CGG GTC ATC ATC GTC AGA AA      |
| AT4G37060 | 4G37Hd177F   | TCT CAA GCT TTG ATA TAG GTA TGC AAA A   |
|           | 4G37Xb1473R  | TTA TTC TAG ATC AAT CTT CTT TTG AAC T   |
| AT4G37070 | 4G37Xb214F   | CAT CTT CTA GAA CAG GTG TTA CTT AG      |
|           | 4G37Xm1445R  | AGT TGC CCG GGC TTC TTT TGA GTT AAG A   |
| AT4G38390 | 4G38Hd284F   | AAA GAA AGC TTC GAG GAT GAT AAC T       |
|           | 4G38Xb1476R  | GCC ATT CTA GAG TTG TAT AAC GCA GAC     |
| AT5G19560 | 5G19Hd513F   | AAC ATA AGC TTC AAA TGA AGC AAT CG      |
|           | 5G19Xb1794R  | ATC TTT CTA GAA CTA AAA GAT CTT G       |
| AT5G22410 | 5G22Hd148F   | GAT CGA AGC TTA GAT TGT TGA TTC A       |
|           | 5G22Xb1053R  | CCA TTT CTA GAT GAA ATT TCT ATA TG      |
| AT5G41280 | 5G41Hd158F   | AAC TAA GCT TTC ATT GTT AAC TAA TAA AAC |
|           | 5G41Xb859R   | GTT TCT AGA TCT TTT TAG AGG TTA TGA     |
| AT5G67400 | 5G674HdF548  | AAT CAA GCT TCA CGG CCT TCT GAA ATT     |
|           | 5G674XbR1526 | GCC ATC TAG ATG GAA ATT ACA AGT TTT TG  |

<sup>1</sup> Abbreviations of restriction enzyme sites in primers: Hd, HindIII; Xb, XbaI; Xm, XmaI

**Table S3. Primers for Constructing *ProEXPA7:RHSs***

| Gene      | Primer name <sup>1</sup> | Primer sequence (5' to 3')             |
|-----------|--------------------------|----------------------------------------|
| At1G05990 | 1G05S1116F               | CTT CGT CGA CAC GCA ACA CTA CAA CTT    |
|           | 1G05Xm653R               | GGA TCC CGG GAC ACA AAA ATG CCA GA     |
| At1G12950 | 1G12Av138F               | TTG TCC TAG GAG AAT GGA GAA AGA TAA TG |
|           | 1G12M12801R              | AAA GAC GCG TCA ATA TGT CTT GAA GTA A  |
| At1G16440 | 1G161S1113F              | CAG AGT CGA CTC TGT TAA TCA GCA ATC A  |
|           | 1G16Xm1564R              | AAG CCC CGG GAC GTT TCG TGT TAC AA     |
| At1G30850 | 1G30S1131F               | TTT CGT CGA CAA ATC TAG TTA TGC CTC CT |
|           | 1G30Kn1068R              | TTT TGG TAC CCT TAT TCA AGC GTT TTG TG |
| At1G34760 | 1G34S1138F               | GAA AGT CGA CGC TAT GGA GAA CGA GAG A  |
|           | 1G34Kn1724R              | GAA AGG TAC CAG GAA AGT GTA AAG CTT TG |
| At1G51880 | 1G51S1116F               | CTG AGT CGA CGC ACT CAC TGC AAA AAA AG |
|           | 1G51Xm4051R              | GAA GCC CGG GAG ATA TTC TCT CAA TTT AT |
| At1G54970 | 1G54S1120F               | AAA AGT CGA CAC ACT AAC CAC GCG CTC C  |
|           | 1G54Kn1434R              | ATA TGG TAC CAT GCA AGA TCA TCA TCA T  |
| At1G63450 | 1G63S1194F               | AAA CGT CGA CAA AAG CTT GTA CAC AAA A  |
|           | 1G63Xm2131R              | AAT ACC CGG GCT ACA TTT GAA AAT TTG AC |
| At1G69240 | 1G69Sc123F               | ACA AGA GCT CCC AAA AAA CCA AAA AAA AA |
|           | 1G69Pt2276R              | TCC GCT GCA GTT TAC ATA ACC GGT AAC    |
| AT1G70460 | 1G70S1138F               | ACA AGT CGA CAA AAT GTC GGA CTC GCC AA |
|           | 1G70Kn3050R              | ATG CGG TAC CAA GAG CTC AAG CAT GAG    |
| AT2G45890 | 2G45Bm88F                | ACA TGG ATC CTT ATA CAC AAT CGT GAT GG |
|           | 2G45Kn2051R              | AAT CGG TAC CCA AAA GAA AAA ACT CAG T  |
| At3G10710 | 3G10Bm137F               | CGG AGG ATC CAA ATA TGT CCT CTC CTT    |
|           | 3G10Kn2130R              | ATT GGG TAC CTC GTT AAC GGA AAC GA     |
| At3G48940 | 3G48S1133F               | CGT AGT CGA CAA GAA ACC ATG ACT TTA G  |
|           | 3G48Kn1492R              | AAA TGG TAC CAC AAT GCA ACA TCA AAG A  |
| At4G02270 | 4G02S1134F               | GCA AGT CGA CAA AAA AAA TGG CTT TCT CA |
|           | 4G02Kn806R               | TCC AGG TAC CTG TTA AAT TTC ATG TTC AT |
| At4G22080 | 4G22S1112F               | TAG TGT CGA CCC CTA CTC AAA CCA TAA A  |
|           | 4G22Xm2013R              | CTA TCC CGG GAA TTA GAT GCA TCT CGT G  |
| AT4G29180 | 4G29Av111F               | TCT GCC TAG GAT GAG CTG AGC TTT ACA AA |
|           | 4G29Nc4082R              | AAA CCC ATG GTG AAT CAA ACC TTG AGT TA |
| At4G37070 | 4G37Av98F                | ACC AAA ACC TAG GTT TAT AAT CTT AAC TC |
|           | 4G37M12133R              | TGG GAC GCG TAT TAT TAA TTT ATT TTA TT |

|           |             |                                        |
|-----------|-------------|----------------------------------------|
| At5G22410 | 5G22S1112F  | CCC CGT CGA CTA GAA TTC ATA TAG AAA TT |
|           | 5G22Xm1533R | ATA TCC CGG GTA ACT TTA TTC AAC TGT T  |

<sup>1</sup> Abbreviations of restriction enzyme sites in primers: Av, AvrII; Bm, BamHI; Hd, HindIII; Kn, KpnI; Ml, MluI; Nc, NcoI; Pt, PstI; Sc, SacI; Sl, Sall; Xb, XbaI; Xm, XmaI



**Table S4. Primers for Genotyping and RT-PCR Analysis of T-DNA Insertion Mutants**

| Gene         | Primer name | Primer sequence (5' to 3')             |
|--------------|-------------|----------------------------------------|
| AT1G05990    | 1G059F685   | AGG GAT TTA CAT CCC GGA CAA G          |
|              | 1G059R1060  | AAA TAA AAC CAT ATT AAT TAG CTA CAA AG |
| AT1G12950    | 12950F1201  | TTC TGC TGC CAT GCT CTG GTG A          |
|              | 12950R1893  | GCT GTC GAC AAT ATC ACA GCC ACA        |
| AT1G18940    | 1G189F696   | GAG GAC CTT GGG TGG TGA TT             |
|              | 1G189R1239  | ATA CAA GAC AAG CAC AGT GGA TG         |
| AT1G30850    | 1G308F550   | CGA TAA TGA GTG GCA AGG TTT            |
|              | 1G308R1274  | TTC ACC GCA ACG TCG TGT TA             |
| AT1G51880    | 5G518F524   | GGT GCA GTC CTC GAG ATG ATT CA         |
|              | 5G518R1338  | GGA GTA CAC ATT CTG ACC ACC ATT        |
| AT1G70460    | 1G704F2303  | GGG AAG GGA AGG CCA GTA CTT GAA T      |
|              | 1G704R2751  | ATG TAC AGT GGA GAC TAC TCT GTC C      |
| AT2G03720    | 2G037F637   | CAA GCT GAG AGT GGG AGG AAA            |
|              | 2G037R1278  | CCT TTC TCC TCC GCC GTT T              |
| At2G45890    | 2G458F519   | AGT TCT TCG AAT TCC GAC CAA A          |
|              | 2G458R1201  | CTC AAC GTT AGT ACC AAG AGA TCT        |
| AT5G19560    | 5G195F1323  | AGG GGA GAC CTC TGC GTT A              |
|              | 5G195R2185  | CTG ATC CTT GAA GTT GTC CAA A          |
| AT5G67400    | 5G674F585   | ACA ACC ACT GCT CAA CTC AAA            |
|              | 5G674R1598  | TCA ACG GCG TGT GTG AGG TT             |
| At ACTIN     | At-actin2F  | GTG TGT CTT GTC TTA TCT GGT TCG        |
|              | At-actin2R  | AAT AGC TGC ATT GTC ACC CGA TAC T      |
| T-DNA border | LBb1        | GCG TGG ACC GCT TGC TGC AAC T          |

**Table S5. Primers for RT-PCR Analysis of RHSox Transformants**

| Gene      | Primer name | Primer sequence (5' to 3')             |
|-----------|-------------|----------------------------------------|
| AT1G05990 | 1G05S1116F  | CTT CGT CGA CAC GCA ACA CTA CAA CTT    |
|           | 1G05Xm653R  | GGA TCC CGG GAC ACA AAA ATG CCA GA     |
| AT1G12950 | 1G12FSq1012 | GGC CAT GGC AGG GAT TT                 |
|           | 1G12R1893   | GCT GTC GAC AAT ATC ACA GCC ACA        |
| AT1G16440 | 1G161S1113F | CAG AGT CGA CTC TGT TAA TCA GCA ATC A  |
|           | 1G16Xm1564R | AAG CCC CGG GAC GTT TCG TGT TAC AA     |
| AT1G70460 | 1G70S1138F  | ACA AGT CGA CAA AAT GTC GGA CTC GCC AA |
|           | 1G70Kn3050R | ATG CGG TAC CAA GAG CTC AAG CAT GAG    |
| AT2G45890 | 2G45Bm88F   | ACA TGG ATC CTT ATA CAC AAT CGT GAT GG |
|           | 2G45Kn2051R | AAT CGG TAC CCA AAA GAA AAA ACT CAG T  |
| AT4G29180 | 4G29Av111F  | TCT GCC TAG GAT GAG CTG AGC TTT ACA AA |
|           | 4G29Nc4082R | AAA CCC ATG GTG AAT CAA ACC TTG AGT TA |
| AT5G22410 | 5G22S1112F  | CCC CGT CGA CTA GAA TTC ATA TAG AAA TT |
|           | 5G22Xm1533R | ATA TCC CGG GTA ACT TTA TTC AAC TGT T  |
| At ACTIN  | At-actin2F  | GTG TGT CTT GTC TTA TCT GGT TCG        |
|           | At-actin2R  | AAT AGC TGC ATT GTC ACC CGA TAC T      |
| At EXPA7  | E7RTFW2165  | GTA TCA TCC CAG TTG CAT ACC GAA        |
|           | E7RTRV2609  | GTT TGG TAG GGC AAA AGC CTA G          |
